# Supplementary material for: The PIN domain of EXO1 recognizes poly(ADP-ribose) in DNA damage response
Source: PubMed Central journal article supplement — Nucleic Acids Res. 2015 Sep 22;43(22):10782–94. doi: 10.1093/nar/gkv939 (PMC4678857; doi:10.1093/nar/gkv939), 2015-09-22

## **Supplemental Figure legends**

### **Supplemental Figure 1**

Recombinant GST-EXO-PIN was incubated with or without biotin-PAR. The interaction was examined by streptavidin bead pull-down assay and Western blot with anti-GST antibody.

### **Supplemental Figure 2**

(A) ITC analyses show the binding affinity between the EXO1-PIN and PAR. The  $K_d$  is indicated in the lower panel. (B) The *in vivo* interaction between EXO1 and PAR was examined by co-IP and reciprocal co-IP. U2OS cells were treated with 20 J/m<sup>2</sup> UV. 5 minutes after UV treatment, cells were lysed and analyzed with indicated antibodies. Input or IPed samples were analyzed by dot blotting or Western blotting with the indicated antibodies.

### **Supplemental Figure 3**

EXO1 itself is not PARylated in response to IR. Same as Figure 3D except that the precipitation of co-IP was treated with or without 1 % SDS.

### **Supplemental Figure 4**

EXO-PIN (R93G) interacts with MSH3. GFP-EXO1-PIN (R93G) was expressed in U2OS cells. The interaction between EXO1-PIN (R93G) and MSH3 was examined with indicated antibodies.

### **Supplemental Figure 5**

R93G mutant partially rescue wild type EXO1 function in HR repair. U2OS-DrGFP cells were treated with the indicated siRNA. The siRNA-treated cells were then transfected siRNA-resistant EXO1 plasmid and infected by adeno-I-SecI. The percentage of GFP-positive cells was examined by flow cytometry. Data are averages from three independent experiments.

Supplemental Figure 1

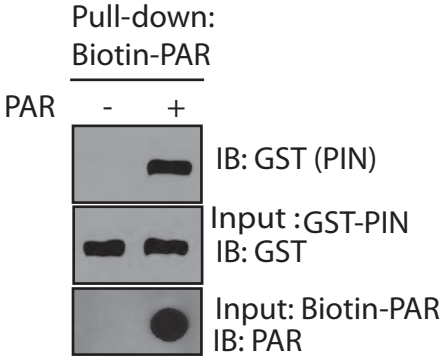

Supplemental Figure 2

A

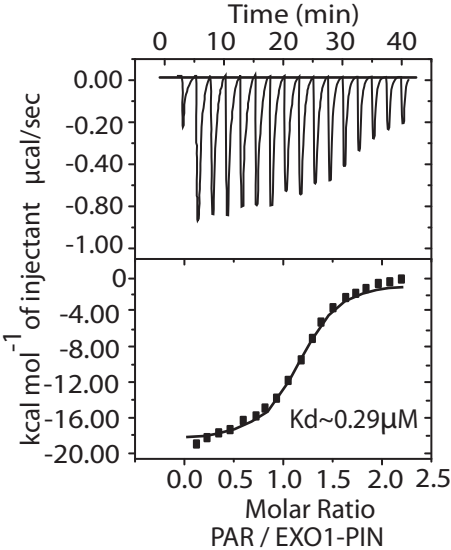

B

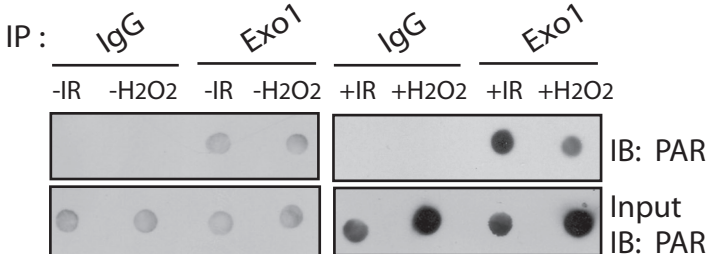

### Supplemental Figure 3

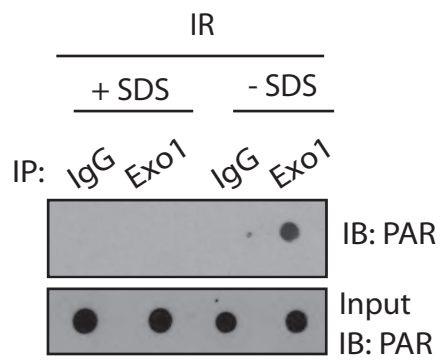

Supplemental Figure 4

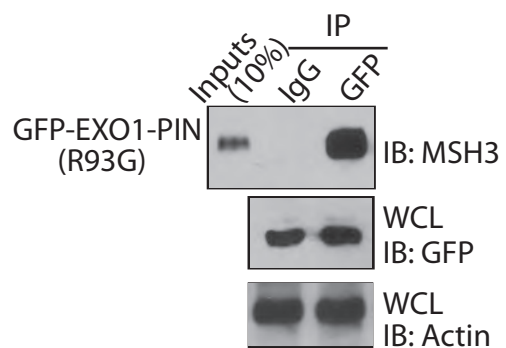

Supplemental Figure 5

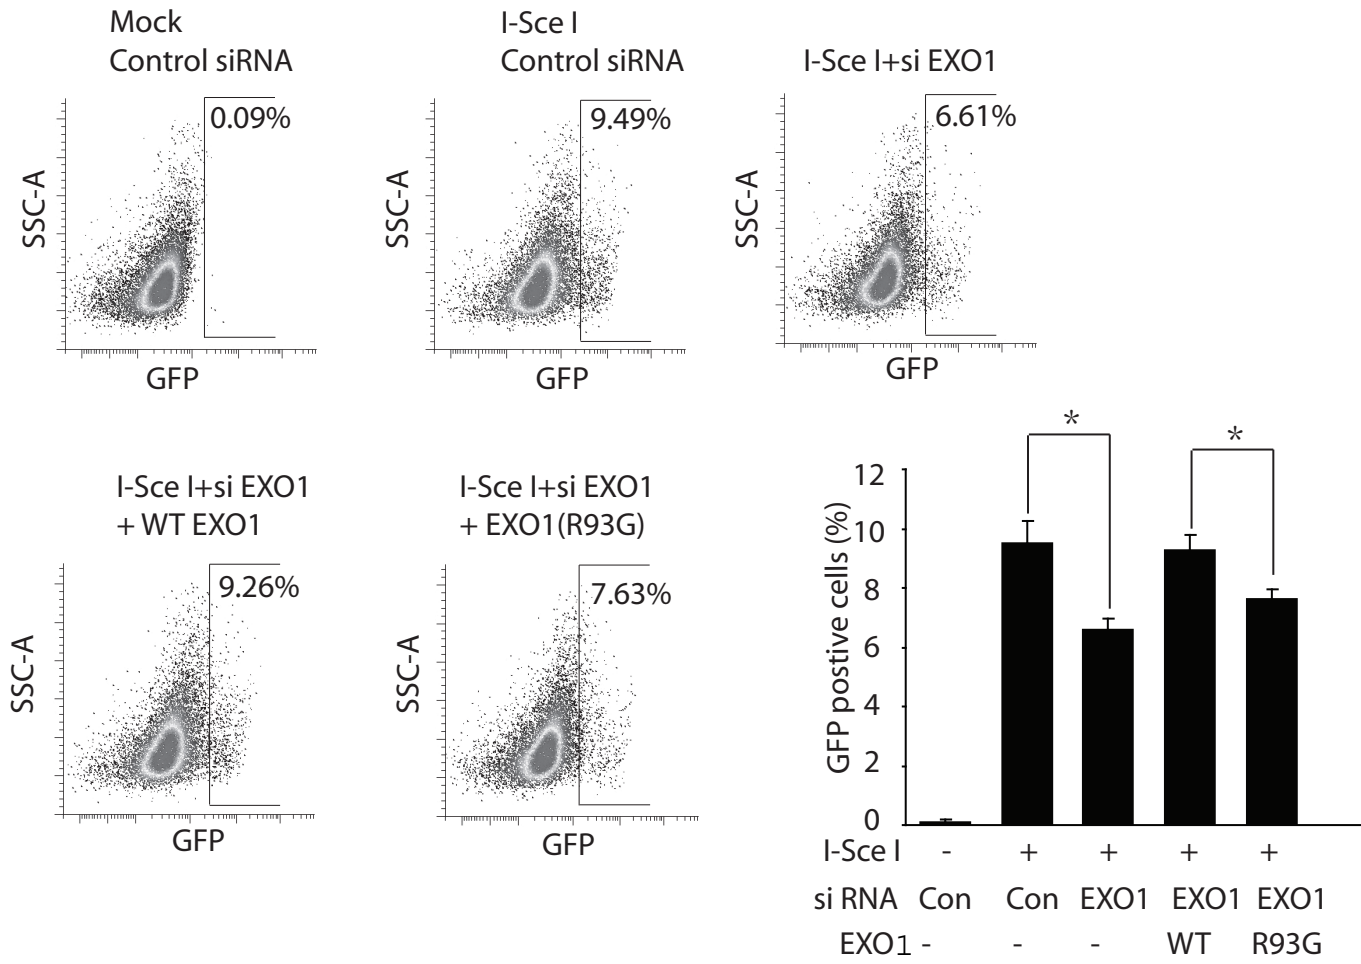

Supplement: supp_gkv939_nar-02072-d-2015-File009.pdf [file supp_gkv939_nar-02072-d-2015-File009.pdf]
